# Supplementary material for: Use of voltage for recomposing degraded redox active molecules for flow battery applications
Source: Royal Society of Chemistry journal article supplement (doi:10.1039/d3ta00624g), 2023-01-01
Supplement: d3ta00624g1.pdf [file d3ta00624g1.pdf]

## Supplementary Information

# Use of voltage for recomposing degraded redox active molecules for flow battery applications

**Abhilipsa Sahoo<sup>a</sup>, Kothandaraman Ramanujam<sup>a,b\*</sup>**

**Department of Chemistry, Indian Institute of Technology Madras, India**

*<sup>a</sup>Clean Energy Lab, Department of Chemistry, Indian Institute of Technology Madras, Chennai 600036, Tamil Nadu, India*

*<sup>b</sup>Advanced Centre for Energy Storage and Conversion-The Energy Consortium, Indian Institute of Technology Madras, Chennai 600 036*

\*Corresponding author's E-mail: [rkraman@iitm.ac.in](mailto:rkraman@iitm.ac.in)

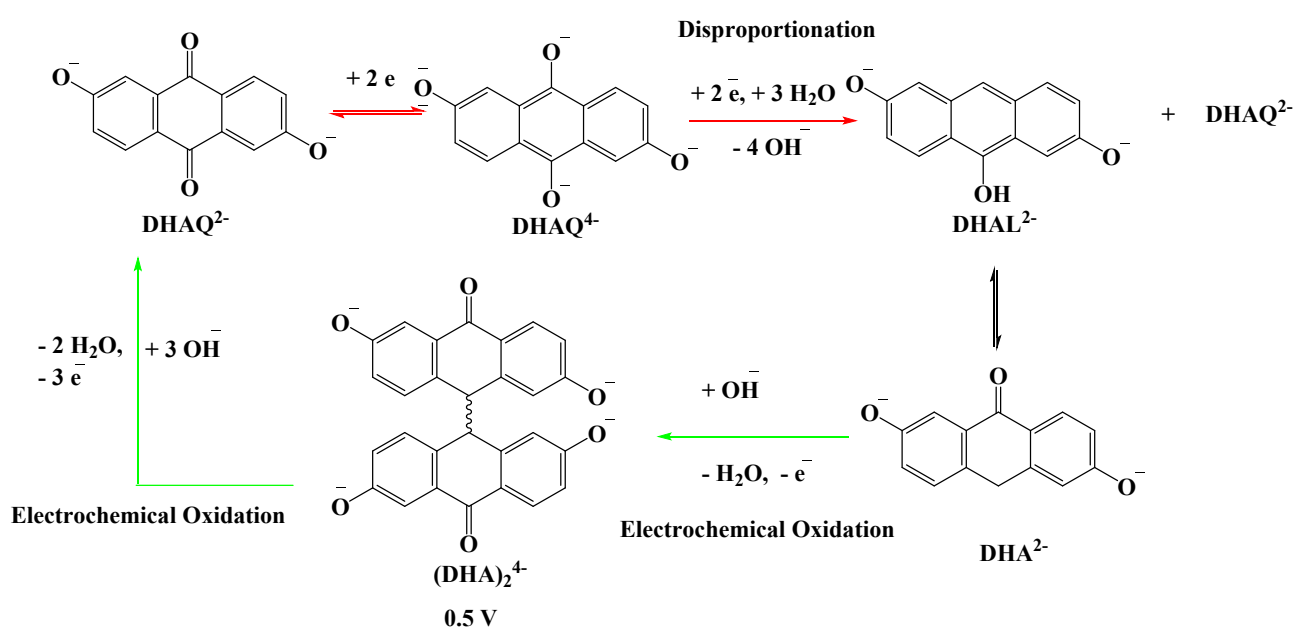

**Scheme S1.** Electrochemical re-composition of DHAQ<sup>2-</sup>.

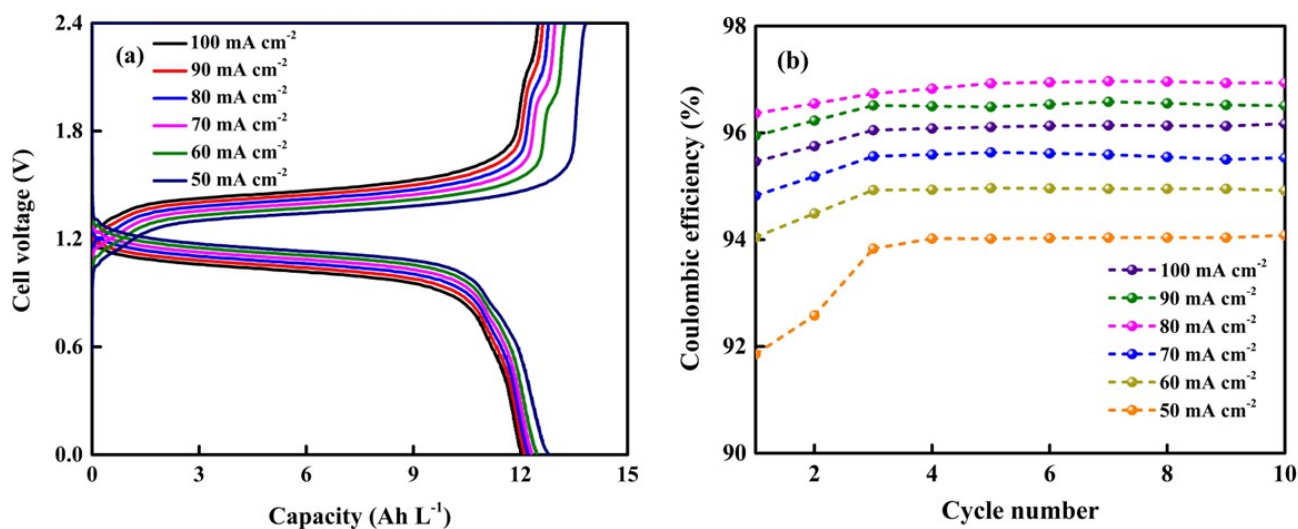

**Fig. S1.** (a) Rate capability study with 0.25 M anolyte and 0.5 M catholyte at 50, 60, 70, 80, 90 and 100 mA cm<sup>-2</sup> (b) Coulombic efficiency at different scan rate.

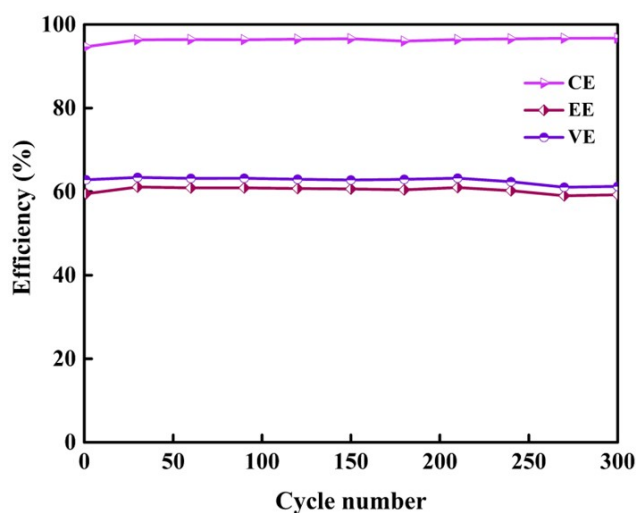

**Fig. S2.** Coulombic efficiency (CE), Voltage efficiency (VE) and Energy efficiency (EE) of DHAQ - K<sub>4</sub> [Fe(CN)<sub>6</sub>] system at 80 mA cm<sup>-2</sup> current density.

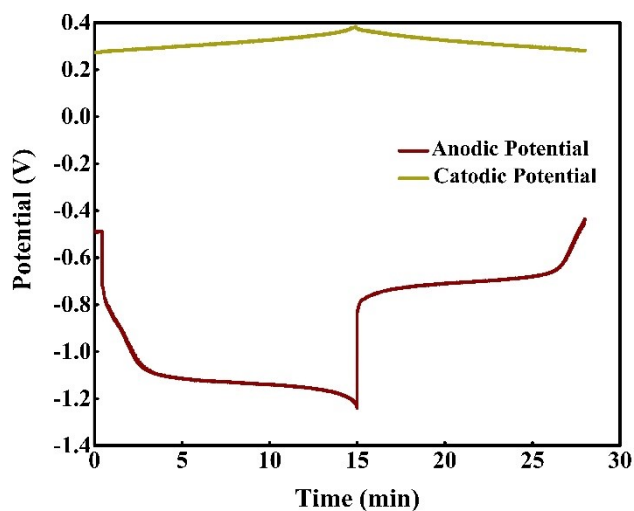

**Fig. S3.** Single electrode potential study of DHAQ -  $K_4 [Fe (CN)_6]$  system charged up to 2.4 V cut-off cell voltage.

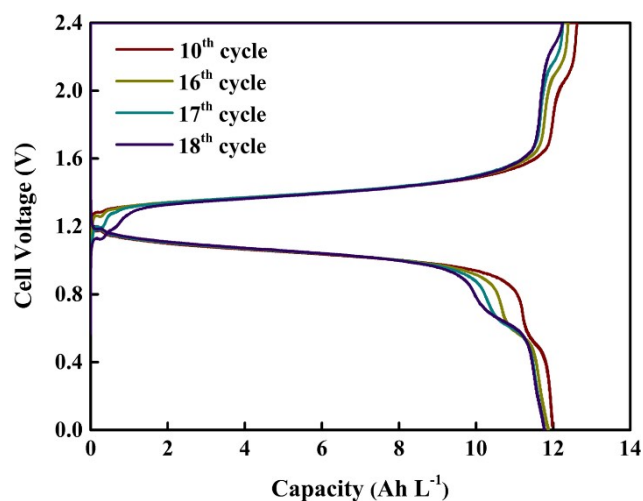

**Fig. S4.** 10<sup>th</sup>, 16<sup>th</sup>, 17<sup>th</sup> and 18<sup>th</sup> GCD cycles.

To determine the equilibrium constant of dimerization, the sample after the 120<sup>th</sup> discharge cycle was subjected to a CV study. First, the analyte was cycled in a potential range of -1.4 V to 0.6 V to see the oxidation of the dimer. Subsequently, CV was performed only up to 0.15 V to prove the species correspond to the peak at -0.8 V is unrelated with peroxy dimer oxidation observed at ~ 0.4 V. As can be seen from Fig. S5, the peak current of DHAQ<sup>2-</sup>/DHAQ<sup>4-</sup> redox couple at ~ -0.9 V has increased while using a shorter potential window, without affecting the small plateau observed at -0.8 V. So, the increment in the peak current (due to the peroxy

dimer reduction into  $\text{DHAQ}^{4-}$ ) can be directly correlated with the species responsible for 0.4 V peak, i.e., dimer. Therefore, the difference in the area of the reduction peaks (the peak spanning from -0.66 V to -1.4 V) obtained from the CVs recorded up to 0.15 V and 0.6 V is proportional to the concentration of the dimer formed. The area under the reduction peak of the CV carried out up to 0.6 V is proportional to the equilibrium concentration of  $\text{DHAQ}^{2-}$ . To precisely calculate the concentration of the  $\text{DHAQ}^{2-}$  in the GCD cycled solution, we have performed CV of 0.075, 0.1, 0.125 and 0.15 M  $\text{DHAQ}^{2-}$  solutions to generate a calibration graph (Fig. S6). The concentration of  $\text{DHAQ}^{2-}$  species is 0.081 M in the GCD cycled solution as obtained from the peak spanning from -0.66 V to -1.4 V. The difference in area corresponds to the concentration of  $\text{DHAQ}^{2-}$  lost in the form of  $(\text{DHAQ})_2^{6-}$ , therefore the estimated concentration of  $(\text{DHAQ})_2^{6-}$  is 0.009 M. Using equations (1) and (2), the calculated equilibrium constant is 1.3.

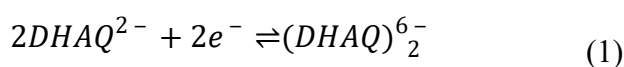

$$\text{Equilibrium constant} = \frac{[(\text{DHAQ})_2^{6-}]}{[\text{DHAQ}^{2-}]^2} \quad (2)$$

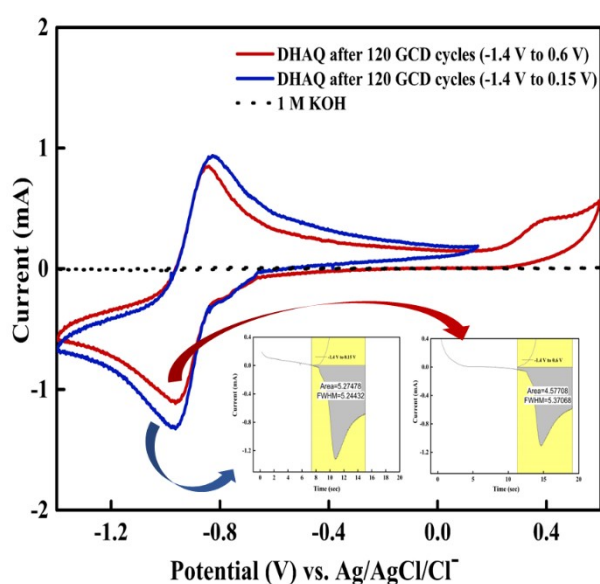

**Fig. S5.** Cyclic voltammograms of 0.1 M 2,6-DHAQ in 1 M KOH before and after 120 GCD cycles (the cell was run with 0.25 M 2,6-DHAQ and diluted later with 1 M KOH to obtain nominal concentration of 0.1 M) along with the CV of 1M KOH solution (inset shows the integrated area of cathodic peaks).

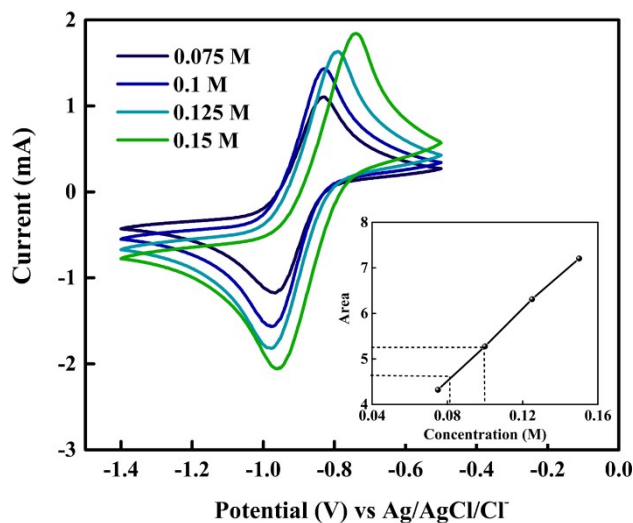

**Fig. S6.** Cyclic voltammogram of 0.075 M, 0.1 M, 0.125 M and 0.15 M DHAQ in 1 M KOH (inset shows the area under cathodic peak vs. concentration of DHAQ).

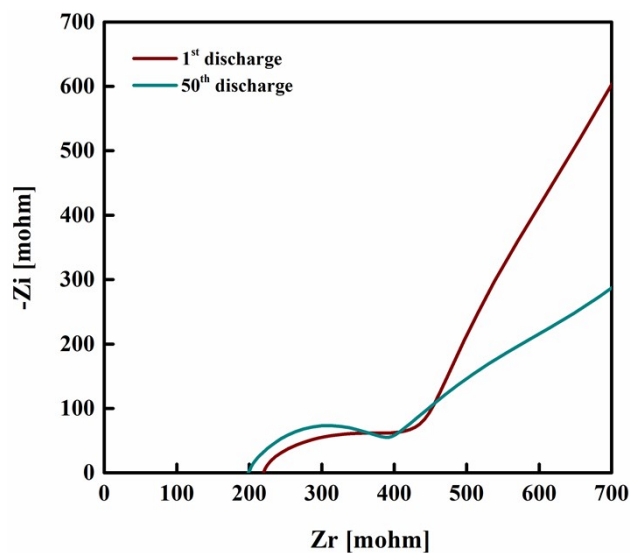

**Fig. S7.** EIS data of the cell after 1<sup>st</sup> and 50<sup>th</sup> discharge.

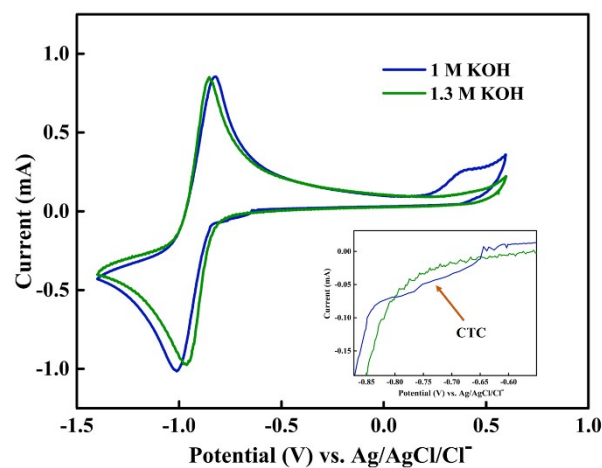

**Fig. S8.** Cyclic voltammogram of 0.1 M DHAQ in 1 M KOH after 300 GCD cycles and 0.1 M DHAQ in 1.3 M KOH after 150 GCD cycles (inset shows the peak due to CTC)

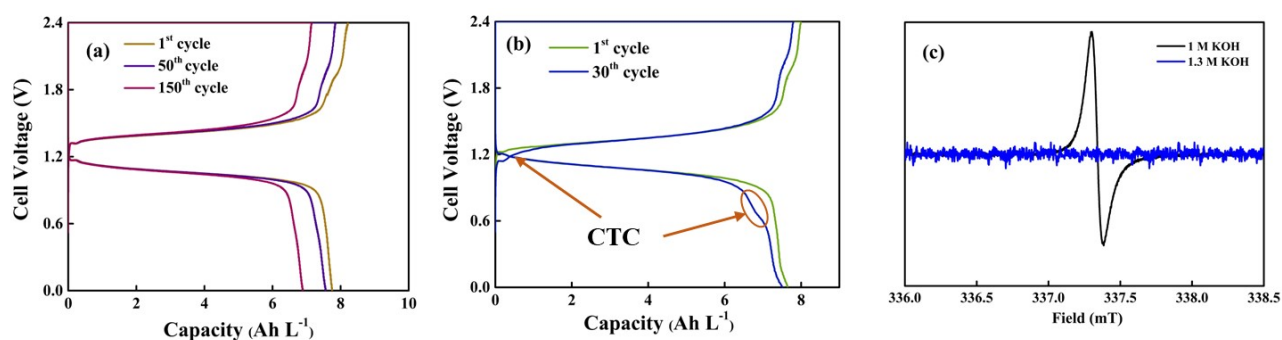

**Fig. S9.** GCD profile of 0.16 M 2,6-DHAQ analyte in (a) 1.3 M KOH for 1<sup>st</sup>, 50<sup>th</sup> and 150<sup>th</sup> cycles, and (b) in 1 M KOH for 1<sup>st</sup> and 30<sup>th</sup> cycles (current density of 80 mA cm<sup>-2</sup>), (c) The EPR spectra of analyte at different KOH concentrations, which were charged up to 2.4 V, confirming absence of CTC in 1.3 M KOH based electrolyte.

## Reference

- 1 Y. Jing, E. W. Zhao, M. A. Goulet, M. Bahari, E. M. Fell, S. Jin, A. Davoodi, E. Jónsson, M. Wu, C. P. Grey, R. G. Gordon and M. J. Aziz, *Nature Chemistry* 2022, **14**, 1103–1109.
